# Supplementary material
Source: Springer Nature journal article supplement (https://www.springermedizin.de/resource/supplementary/12889_2014_6706_MOESM3_ESM.pdf/9498782)
Supplement: MOESM3 [file 9498782]

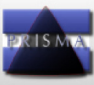

# PRISMA 2009 Flow Diagram:

**Evidence for low high-density lipoprotein cholesterol levels in Australian Indigenous peoples: a systematic review**

Identification

Records identified through database searching  
(n = 93)

Additional records identified through other sources  
(n = 4)

Screening

Records after duplicates removed  
(n = 81)

Records screened  
(n = 81)

Records excluded  
(n = 15)  
Not Australian (n=11)  
Not adult (n=2)  
Not a study (n=1)  
Not a human study (n=1)

Eligibility

Full-text articles assessed for eligibility  
(n = 66)

Studies included in qualitative synthesis  
(n = 15)

Full-text articles excluded, with reasons  
(n = 51)  
No HDL-C data (n=16)  
No sex-specific HDL-C data (10)  
Duplicate population studied (n=8)  
Only reported low HDL-C prevalence (n=5)  
Inappropriate HDL-C stratification (n=12)

Included

Studies included in quantitative synthesis (including correlation analyses)  
(n = 15)

From: Moher D, Liberati A, Tetzlaff J, Altman DG, The PRISMA Group (2009). Preferred Reporting Items for Systematic Reviews and Meta-Analyses: The PRISMA Statement. PLoS Med 6(6): e1000097. doi:10.1371/journal.pmed1000097

For more information, visit [www.prisma-statement.org](http://www.prisma-statement.org).
